# Supplementary material for: Acquisition and carriage dynamics of fluoroquinolone resistant Enterobacteriaceae at individual and household levels
Source: bioRxiv or medRxiv preprint supplement (doi:10.1101/2020.10.29.20222364), 2020-11-03
Supplement: Supplementary file [file media-1.pdf]

# Acquisition and carriage dynamics of fluoroquinolone resistant Enterobacteriaceae at individual and household levels

Patrick Musicha<sup>1,2</sup>, Andrew J. Stewardson<sup>3</sup>, Yin Mo<sup>1,2</sup>, Jascha Vervoort<sup>4</sup>, Niels Adriaenssens<sup>4,5</sup>, Samuel Coenen<sup>4,5</sup>, Maciek Godycki-Cwirko<sup>6</sup>, Anna Kowalczyk<sup>6</sup>, Christine Lammens<sup>4</sup>, Surbhi Malhotra-Kumar<sup>4</sup>, Herman Goossens<sup>4</sup>, Stephan Harbarth<sup>7</sup>, and Ben S. Cooper<sup>1,2</sup>

<sup>1</sup>Centre for Tropical Medicine and Global Health, Nuffield Department of Medicine, University of Oxford, Oxford, United Kingdom

<sup>2</sup>Mahidol-Oxford Tropical Medicine Research Unit, Mahidol University, Bangkok, Thailand

<sup>3</sup>Department of Infectious Diseases, The Alfred Hospital and Central Clinical School, Monash University, Melbourne, Victoria, Australia

<sup>4</sup>Vaccine & Infectious Disease Institute, University of Antwerp, Antwerp, Belgium

<sup>5</sup>Department of Primary and Interdisciplinary Care, University of Antwerp, Antwerp, Belgium

<sup>6</sup>Centre for Family and Community Medicine, Medical University of Lodz, Lodz, Poland

<sup>7</sup>Division of Infectious Diseases, University of Geneva Hospitals and Faculty of Medicine, Geneva, Switzerland

## Supplementary Results

### Acquisition and carriage dynamics of FQR-E using a three states individual level model

We also considered the density of FQR-E in stools with an individual-level model with three states: not colonised, low density colonisation, and high density colonisation. The baseline rate of transitioning from no colonisation to low density colonisation was 0.4 (95% CrI=[0.10,1.54]); the colonisation density increased to high from low at a baseline rate of 0.07 (95% CrI=[0.04,0.14]) per day. Individuals transitioned from the high density colonisation state to the low density colonisation state at a baseline rate of 0.06 (95%CrI=[0.03,0.10]) per day and were cleared of any detectable colonisation at a daily rate of 3.37 , although this was associated with a high amount of uncertainty (95% CrI=[ 0.83, 13.04]).

### Supplementary Figures

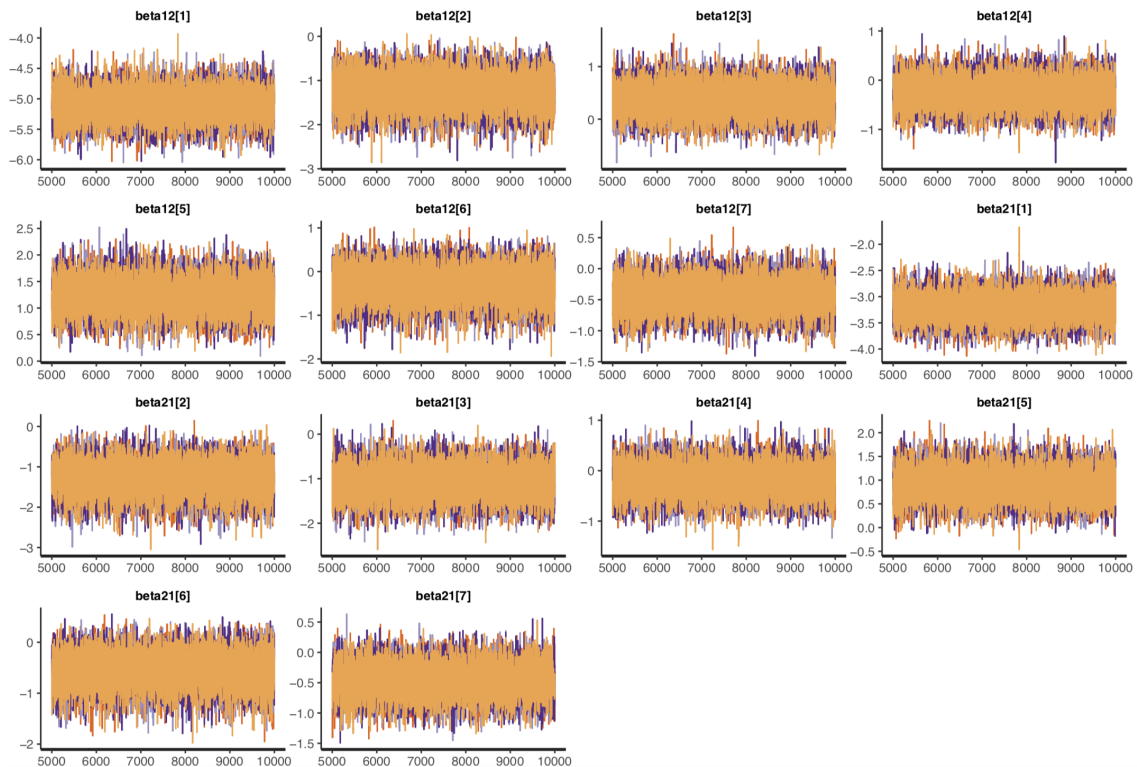

Figure S1: Traceplots for the Hamiltonian Markov chains, showing sampling behaviour and mixing across chains under the two-states individual level model

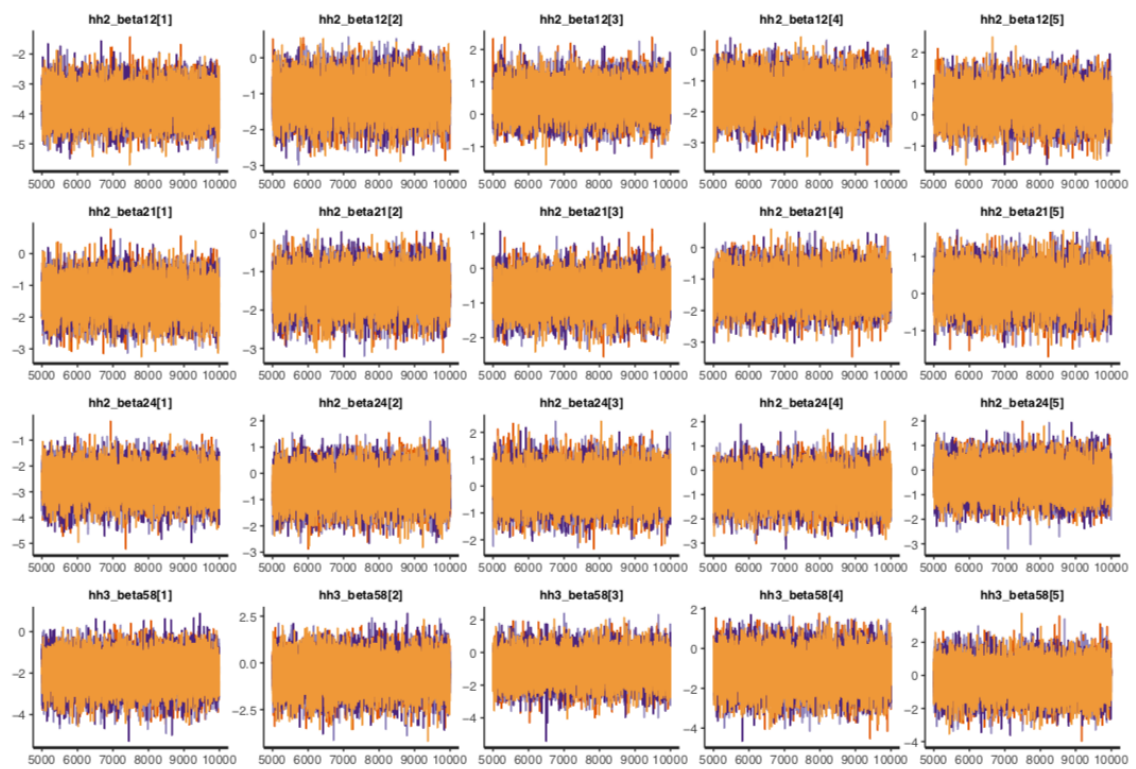

Figure S2: Traceplots for the Hamiltonian Markov chains, showing parameter value sampling behaviour and mixing across chains under the household level transmission model.
